# Supplementary material for: Cellular diversity of the regenerating caudal fin
Source: PubMed Central journal article supplement — Sci Adv. 2020 Aug 12;6(33):eaba2084. doi: 10.1126/sciadv.aba2084 (PMC7423392; doi:10.1126/sciadv.aba2084), 2020-08-12
Supplement: aba2084_SM.pdf [file aba2084_SM.pdf]

[advances.sciencemag.org/cgi/content/full/6/33/eaba2084/DC1](https://advances.sciencemag.org/cgi/content/full/6/33/eaba2084/DC1)

## Supplementary Materials for

### Cellular diversity of the regenerating caudal fin

Yiran Hou, Hyung Joo Lee, Yujie Chen, Jiaxin Ge, Fuji Osman Ibrahim Osman, Anthony R. McAdow, Mayssa H. Mokalled, Stephen L. Johnson, Guoyan Zhao\*, Ting Wang\*

\*Corresponding author. Email: [gzhao@wustl.edu](mailto:gzhao@wustl.edu) (G.Z.); [twang@wustl.edu](mailto:twang@wustl.edu) (T.W.)

Published 12 August 2020, *Sci. Adv.* **6**, eaba2084 (2020)  
DOI: 10.1126/sciadv.aba2084

#### The PDF file includes:

Figs. S1 to S6

#### Other Supplementary Material for this manuscript includes the following:

(available at [advances.sciencemag.org/cgi/content/full/6/33/eaba2084/DC1](https://advances.sciencemag.org/cgi/content/full/6/33/eaba2084/DC1))

Tables S1 to S7

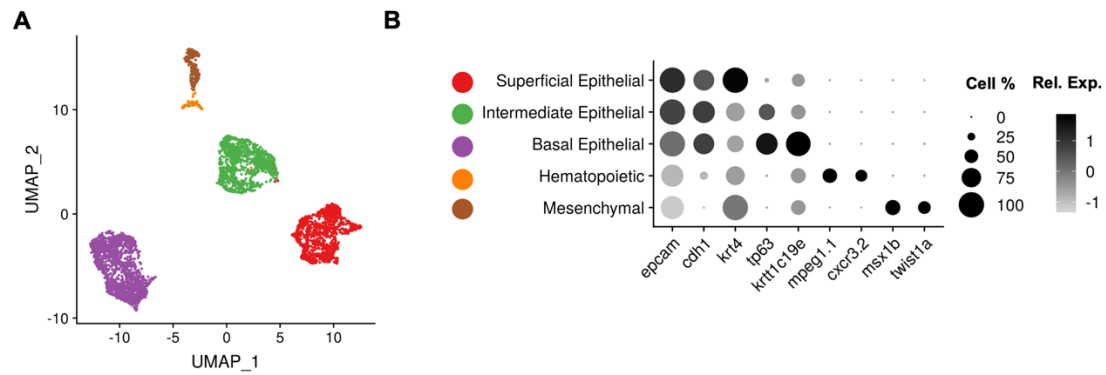

**Figure S1. Basic cell type identification in preinjury caudal fins.** (A) Clustering assignments for cells collected from preinjury stage only. Cells were plotted on UMAP axes. Color code used is the same for (A) and (B). (B) Relative expression of markers used in cell type identification for preinjury cells. Color gradient: normalized relative expression level. Dot size: percentage of cells in the cluster that express the specified gene.

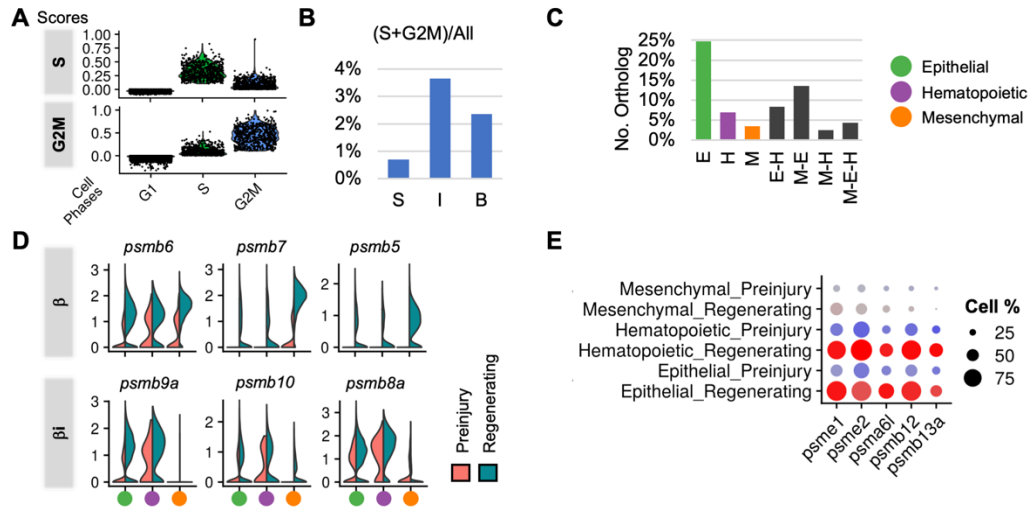

**Figure S2. Common and cell type-dependent cell cycle regulations in S-phase cells.** (A) S phase and G2M phase scores of cells grouped by the assigned cell cycle phases. Phase scores are calculated based on the expression level of cell cycle-related genes (Methods). (B) Percentage of S or G2M phase cells in three epithelial layers. S, Superficial epithelial; I, Intermediate epithelial; B, Basal epithelial. (C) Percentage of S-phase enriched genes that do not have human orthologs. E: Epithelial, H: Hematopoietic, M: Mesenchymal. (D) Expression level distribution of  $\beta$  and  $\beta i$  proteasome subunits in all cells. Cells were first grouped by major cell types, then separated into preinjury and regenerating stages. Color code is the same as in (C). (E) Differential expression of proteasome subunits in all cells grouped by major cell types and their stage of collection. Color gradient: relative expression level, with blue used for all preinjury groups, and red for all regenerating groups. Dot size: percentage of cells in the cluster that express the specified gene.



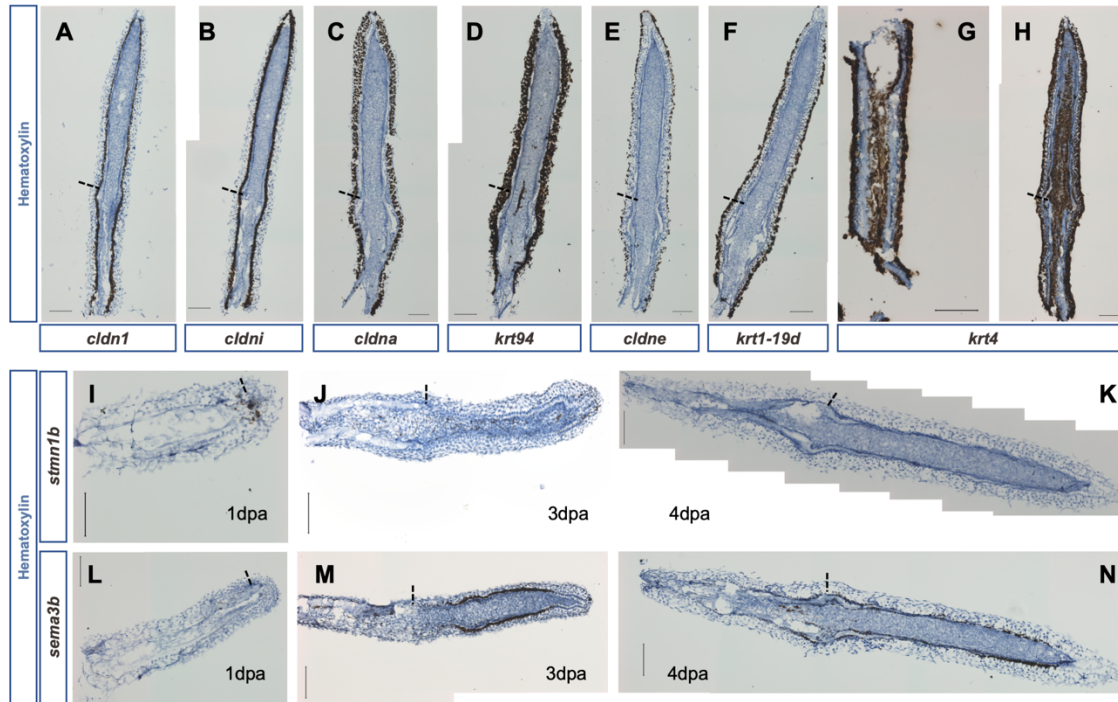

**Figure S4. Expression pattern of candidates separating epithelial subpopulations.** *In situ* hybridization targeting (A) *cldn1*, (B) *cldni*, (C) *cldna*, (D) *krt94*, (E) *cldne*, (F) *krt1-19d*, (G,H) *krt4*, (I-K) *stmn1b*, (L-N) *sema3b*, using (G) preinjury tissue sample, (I,L) 1dpa tissue sample, (J,M) 3dpa tissue sample, or (A-F, H, K,N) 4dpa tissue sample. Brown dots indicate positive RNA signals from target genes, while pale blue blocks represent hematoxylin-stained cell nuclei. Dotted lines indicate the amputation plane. All scale bars are 100µm.

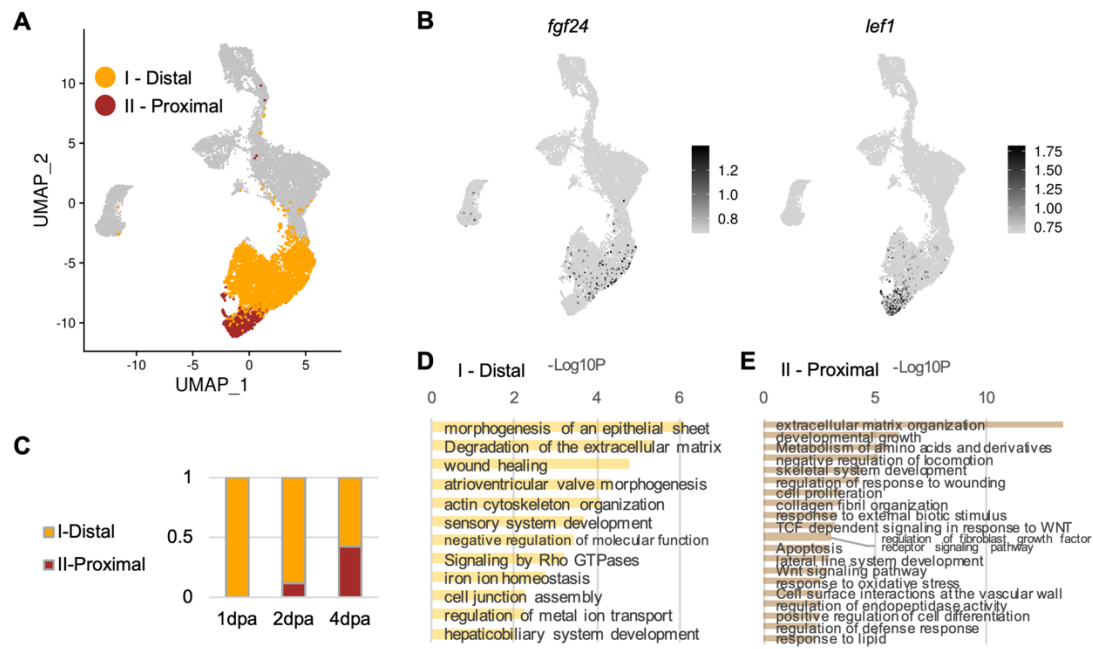

**Figure S5. Features of distal and proximal wound epidermis.** (A) Sub-clustering assignments for regenerating basal epithelial cells shown on the same UMAP axes as in Figure 3D. Clustering results reflected the physical location of the cells. (B) Expression signature of genes marking the distal or proximal region of the wound epidermis in epithelial cells. Cells were plotted on the same UMAP axes as in (A). (C) Proportion of I-Distal and II-Proximal basal epithelial cells in each stage. (D,E) Clustered gene ontology enrichment for genes upregulated in (D) distal or (E) proximal wound epidermis.

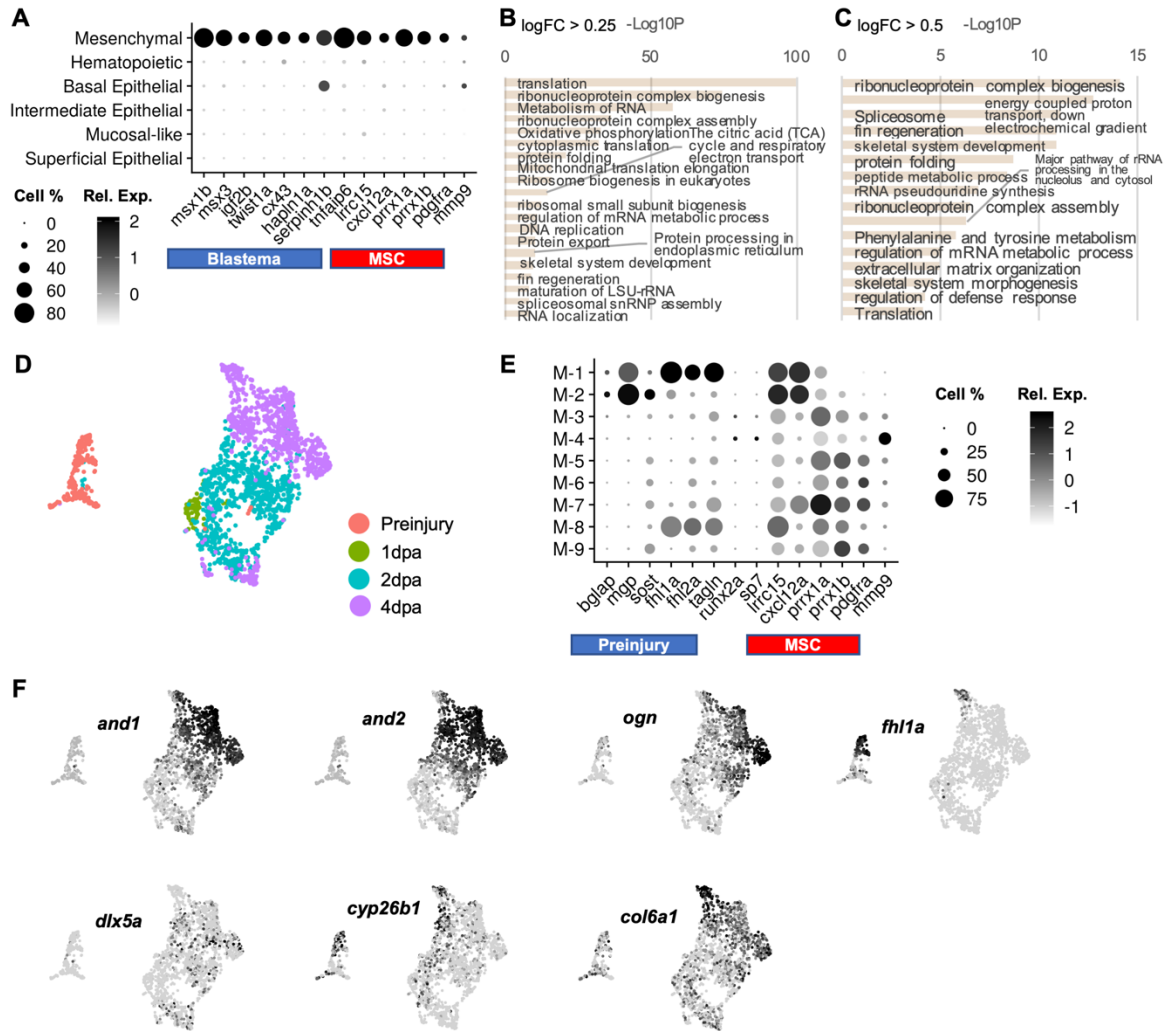

**Figure S6. Expression distribution of blastemal feature genes in the mesenchymal cluster.** (A) Relative expression levels of genes labeling the mesenchymal cluster and orthologs of mammalian MSC markers by major clusters. Color gradient: relative expression level. Dot size: percentage of cells in the cluster that express the specified gene. (B) Stage of collection of mesenchymal cells plotted on the same UMAP axes as in Figure 5A. (C,D) Clustered gene ontology enrichment for genes highly expressed in the mesenchymal cluster with a log fold change over (C) 0.25 or (D) 0.5. (E) Relative expression levels of genes enriched in the two preinjury populations, known bone cell lineage markers (*runx2a*, *sp7*) and orthologs of mammalian MSC markers by mesenchymal sub-clusters. Cluster labels are the same as Figure 5A. Color gradient:

relative expression level. Dot size: percentage of cells in the cluster that express the specified gene. (F) By-gene expression feature plot for genes potentially involved in blastema formation and mesenchymal lineage separations.
